# Supplementary material for: Hexagonal prism-like hierarchical Co9S8@Ni(OH)2core–shell nanotubes on carbon fibers for high-performance asymmetric supercapacitors
Source: Royal Society of Chemistry journal article supplement (doi:10.1039/c7ta07160d), 2017-01-01
Supplement: c7ta07160d1.pdf [file c7ta07160d1.pdf]

# Hexagonal Prism-like Hierarchical $\text{Co}_9\text{S}_8@\text{Ni}(\text{OH})_2$ Core-shell Nanotubes on Carbon Fibers for High-Performance Asymmetric Supercapacitors

*Fangfang Zhu,<sup>a</sup> Ming Yan,<sup>b</sup> Yu Liu,<sup>a,\*</sup> Hao shen,<sup>a</sup> Yong Lei<sup>c</sup> and Weidong Shi<sup>a,\*</sup>*

*<sup>a</sup> School of Chemistry and Chemical Engineering, Jiangsu University, Zhenjiang, 212013, P. R. China.*

*<sup>b</sup> School of Material Science and Engineering, Jiangsu University, Zhenjiang, 212013, P. R. China*

*<sup>c</sup> Institute of Physics & IMN MacroNano (ZIK), Ilmenau University of Technology, Ilmenau 98693, Germany*

*\*E-mail: [swd1978@ujs.edu.cn](mailto:swd1978@ujs.edu.cn). Tel: +86-511-88791800*

**Keywords:** supercapacitor; core-shell; nanotube arrays; asymmetric supercapacitor

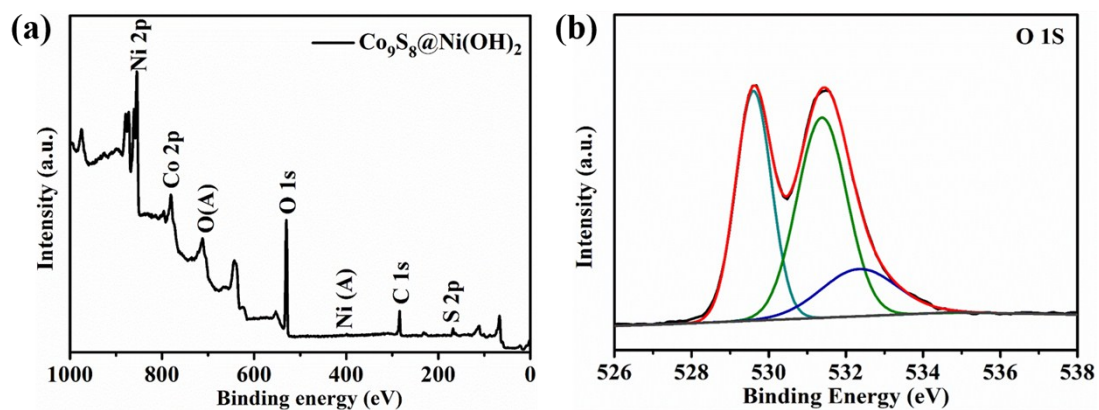

**Fig. S1** (a) XPS survey spectrum of the  $\text{Co}_9\text{S}_8@\text{Ni}(\text{OH})_2$  core-shell nanotube arrays; (b) O 1s XPS spectrum of the  $\text{Co}_9\text{S}_8@\text{Ni}(\text{OH})_2$  electrode.

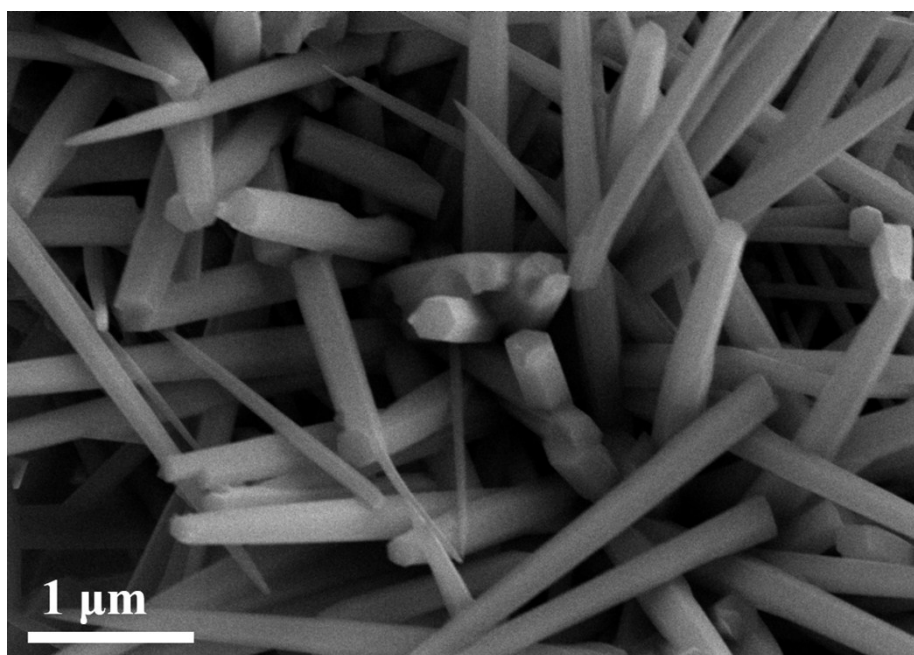

**Fig. S2** SEM image of the precursor  $\text{Co}(\text{CO}_3)_{0.35}\text{Cl}_{0.20}(\text{OH})_{1.10}\cdot 1.74\text{H}_2\text{O}$  solid nanoneedles on CFs.

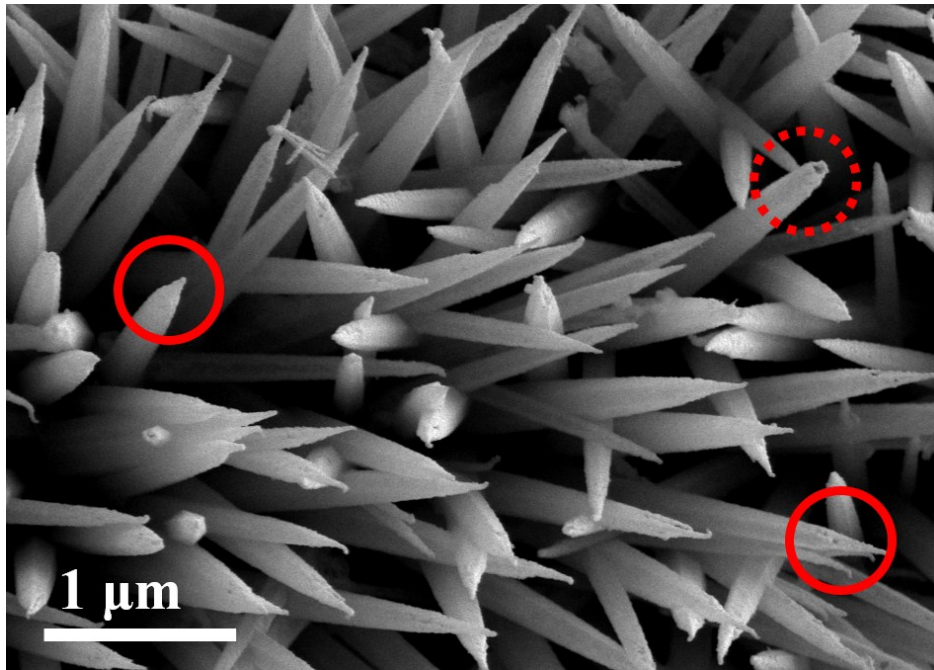

Fig. S3 SEM image of as-prepared hollow Co<sub>9</sub>S<sub>8</sub> nanoneedles.

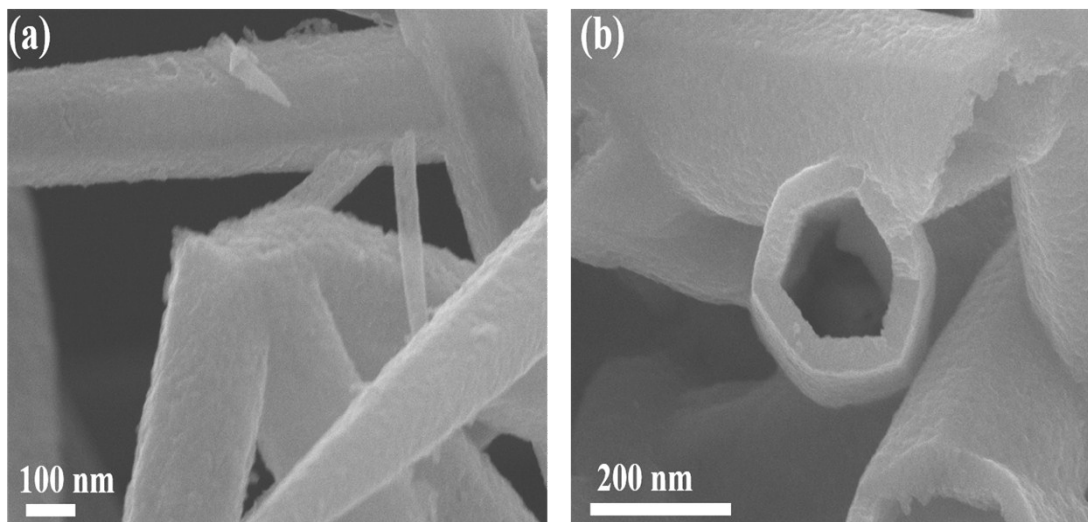

Fig. S4 SEM images of the Co<sub>9</sub>S<sub>8</sub> nanotubes synthesized at 150 °C for 10h.

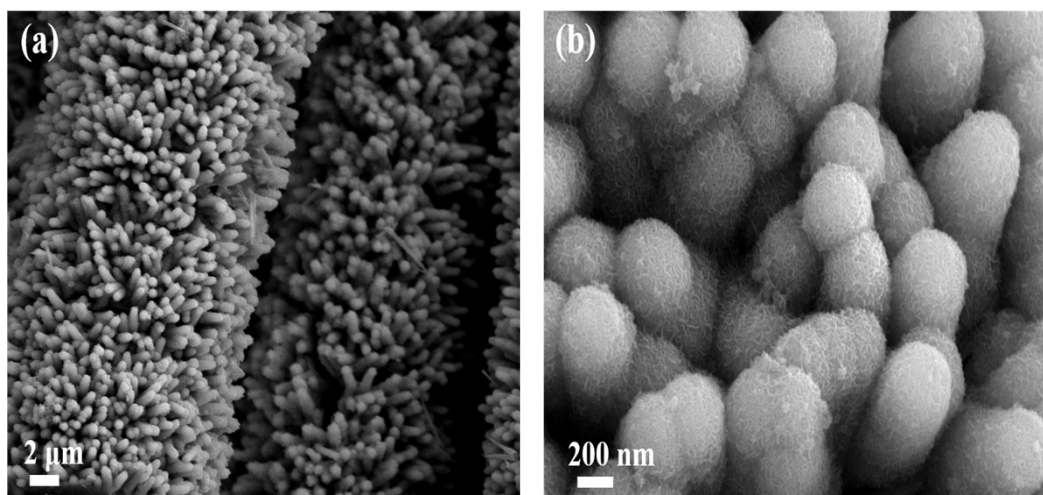

Fig. S5 SEM images of the as-prepared  $\text{Co}_9\text{S}_8@\text{Ni}(\text{OH})_2$  core-shell nanotube arrays at different magnification.

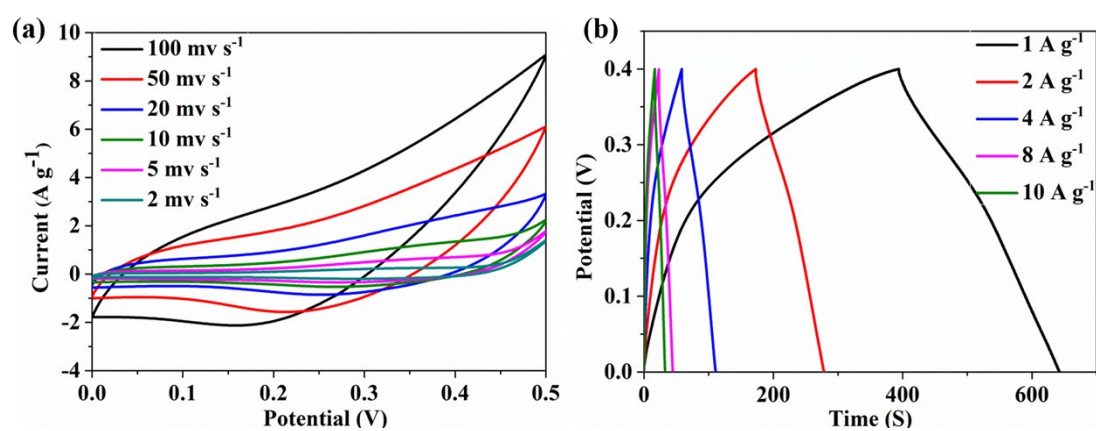

Fig. S6 (a) CV curves of bare  $\text{Co}_9\text{S}_8$  electrode at different scan rates; (b) GCD curves of  $\text{Co}_9\text{S}_8$  electrode at different current densities.

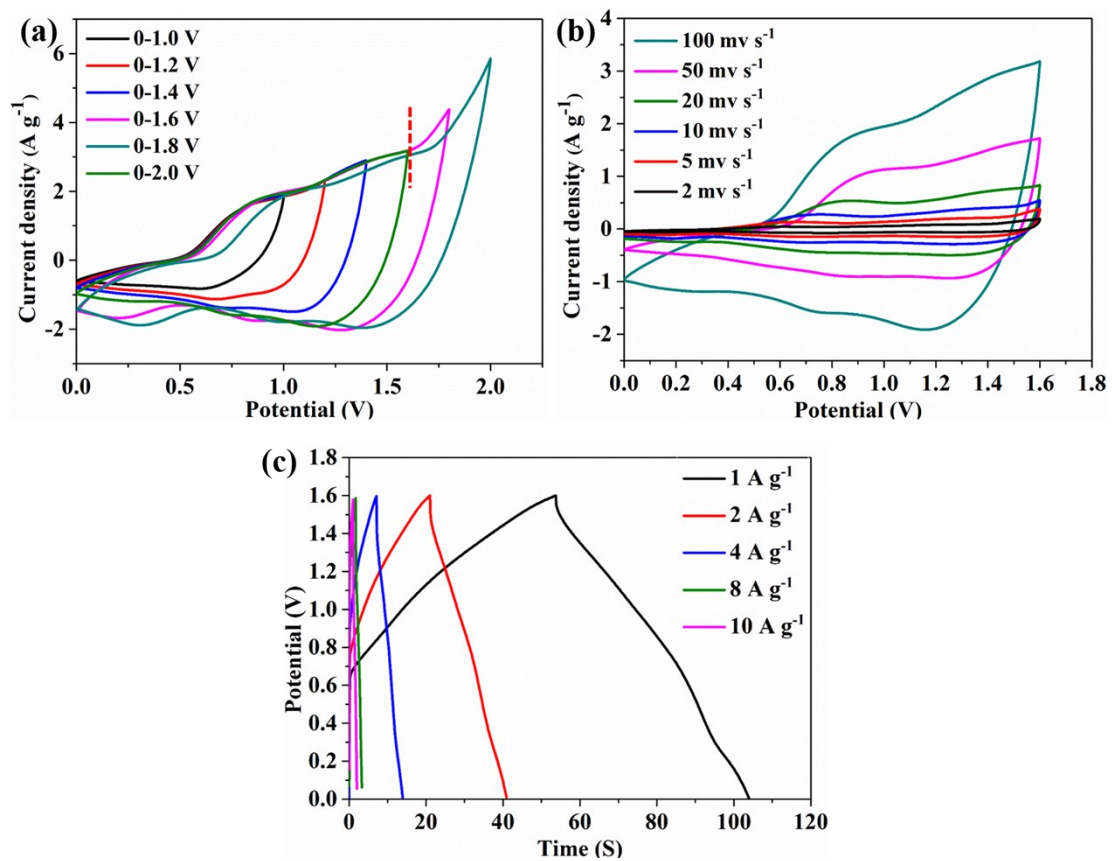

**Fig. S7** (a) CV curves of the  $\text{Co}_9\text{S}_8//\text{AC}$  device collected in different voltage window; (b) CV curves of the  $\text{Co}_9\text{S}_8//\text{AC}$  device at different scan rates in the operation window of 1.6 V; (c) GCD curves of the ASC device measured at different current densities.

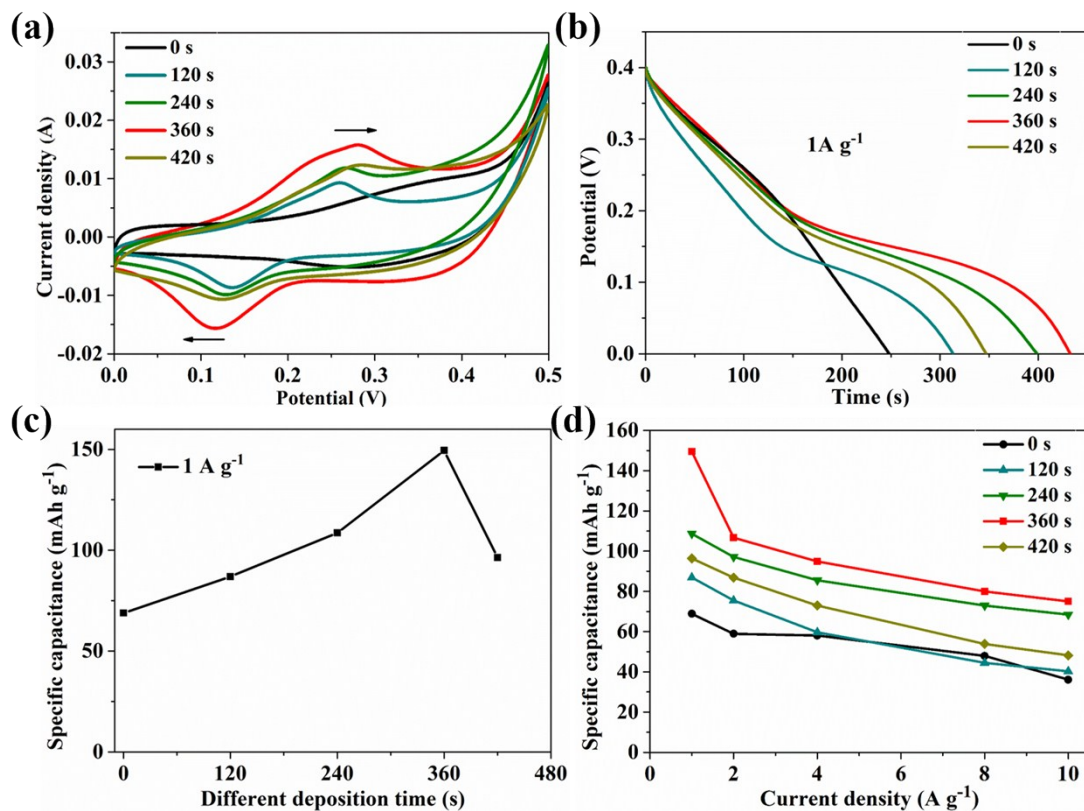

**Fig. S8** (a) CV curves of  $\text{Co}_9\text{S}_8@\text{Ni}(\text{OH})_2$  core-shell nanotubes obtained for different exposition time: 0 s, 120 s, 240 s, 360 s, 420 s. (b) Discharge curves of the  $\text{Co}_9\text{S}_8@\text{Ni}(\text{OH})_2$  core-shell electrodes with different electrodeposition times. (c) The plot of specific capacitance versus different deposition times for  $\text{Co}_9\text{S}_8@\text{Ni}(\text{OH})_2$  electrodes at a current density of  $1 \text{ A g}^{-1}$ . (d) The specific capacity of the electrodes with different exposition time at different current densities.

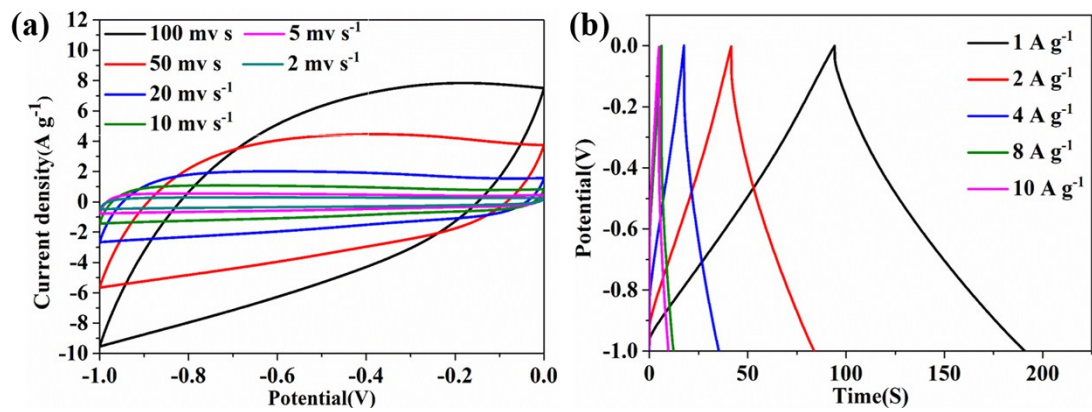

**Fig. S9** (a) CV curves of the AC electrode at different scan rates; (b) Galvanostatic charge-discharge curves at different current densities.
